# Supplementary material
Source: MDPI journal article supplement (https://www.mdpi.com/2311-5629/7/4/71)
Supplement: s1 [file s1]

## Supplementary information:

### Applicability of Atmospheric Plasma Jet (APPJ) discharge for the reduction of Graphene Oxide films and synthesis of the Carbon nanomaterials.

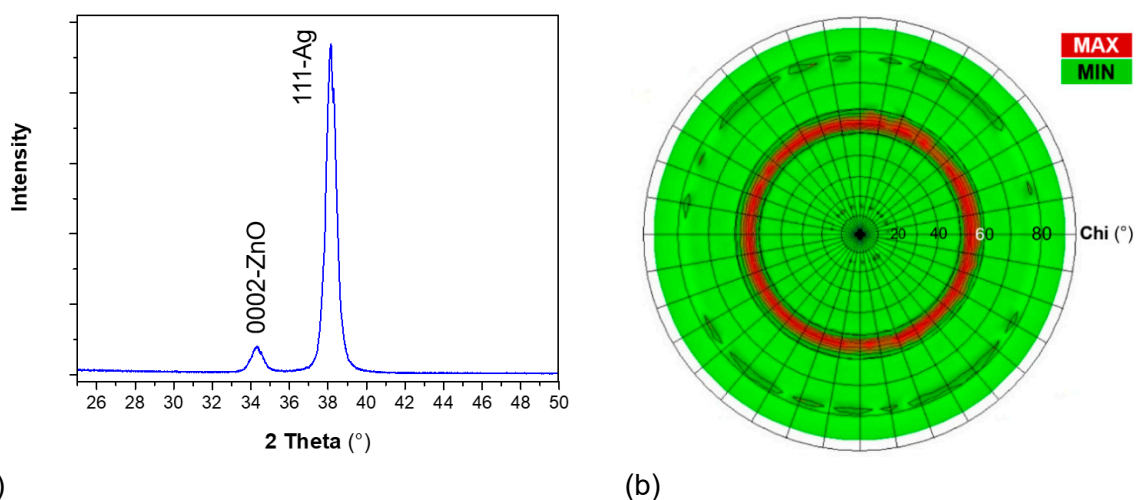

**Figure S1\*.** XRD pattern obtained in symmetric  $\theta$ - $2\theta$ -scanning for the ZnO / Ag substrates used for the carbon APPJ-deposition. (b) Pole-figure measured for the ZnO / Ag substrate at  $2\theta = 44.1^\circ$ . This angle corresponds to the (200)-Ag diffraction maximum.

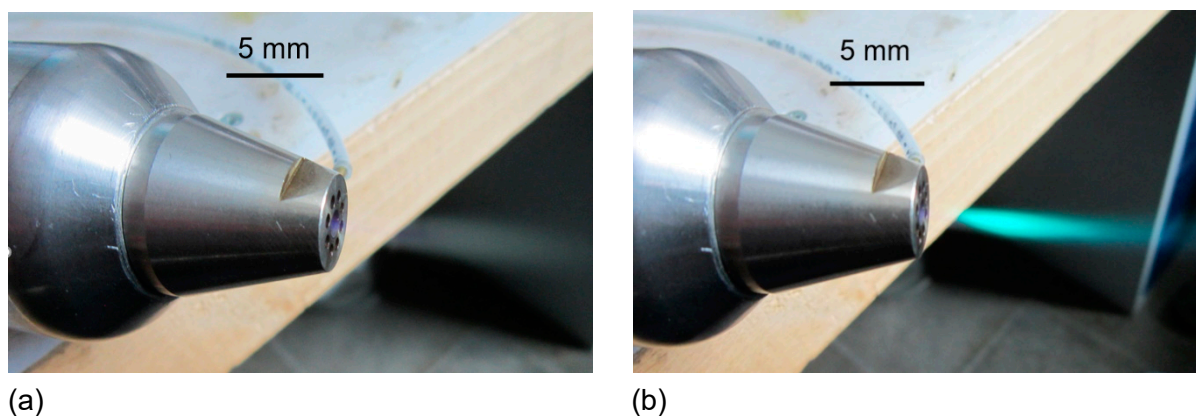

**Figure S2\*.** Photographs of the APPJs used in this work. (a) with 10% vol.  $H_2$  / 90% vol.  $N_2$  gas flow; (b) with centered feeding of  $C_2H_2$  gas in a  $H_2$  /  $N_2$  working jet.

**Table S1\*.** Parameters extracted from the fitted Raman spectra for GO and various rGO on Si substrates. rGO-RF-30s and its reference GO sample (indicated by †) were measured with 633 nm laser excitation, while the remaining were measured with 532 nm laser excitation. Note that the Raman spectra of the rGO-APPJ-5s sample deviated from that of GO which is discussed in the manuscript.

| Sample       | Parameter                    | D-band | G-band | D'-band | D''-band | D*-band |
|--------------|------------------------------|--------|--------|---------|----------|---------|
| GO           | position (cm <sup>-1</sup> ) | 1349   | 1589   | 1617    | 1479     | 1263    |
|              | FWHM (cm <sup>-1</sup> )     | 104    | 66     | 39      | 179      | 118     |
|              | intensity                    | 0.90   | 0.74   | 0.47    | 0.18     | 0.05    |
| rGO-APPJ-2s  | position (cm <sup>-1</sup> ) | 1345   | 1585   | 1613    | 1480     | 1288    |
|              | FWHM (cm <sup>-1</sup> )     | 98     | 64     | 36.8    | 133      | 116     |
|              | intensity                    | 0.97   | 0.68   | 0.59    | 0.13     | 0.05    |
| rGO-APPJ-5s* | position (cm <sup>-1</sup> ) | 1342   | 1587   | 1615    | 1430*    | 1530*   |
|              | FWHM (cm <sup>-1</sup> )     | 113    | 57     | 37      | 62       | 11      |
|              | intensity                    | 0.98   | 0.60   | 0.65    | 0.54     | 0.02    |
| GO †         | position (cm <sup>-1</sup> ) | 1322   | 1570   | 1600    | 1483     | 1196    |
|              | FWHM (cm <sup>-1</sup> )     | 112    | 61     | 39      | 191      | 137     |
|              | intensity                    | 0.96   | 0.47   | 0.44    | 0.16     | 0.05    |
| rGO-RF-30s † | position (cm <sup>-1</sup> ) | 1313   | 1569   | 1595    | 1489     | 1217    |
|              | FWHM (cm <sup>-1</sup> )     | 105    | 60     | 37      | 119      | 72      |
|              | intensity                    | 0.98   | 0.47   | 0.44    | 0.08     | 0.06    |

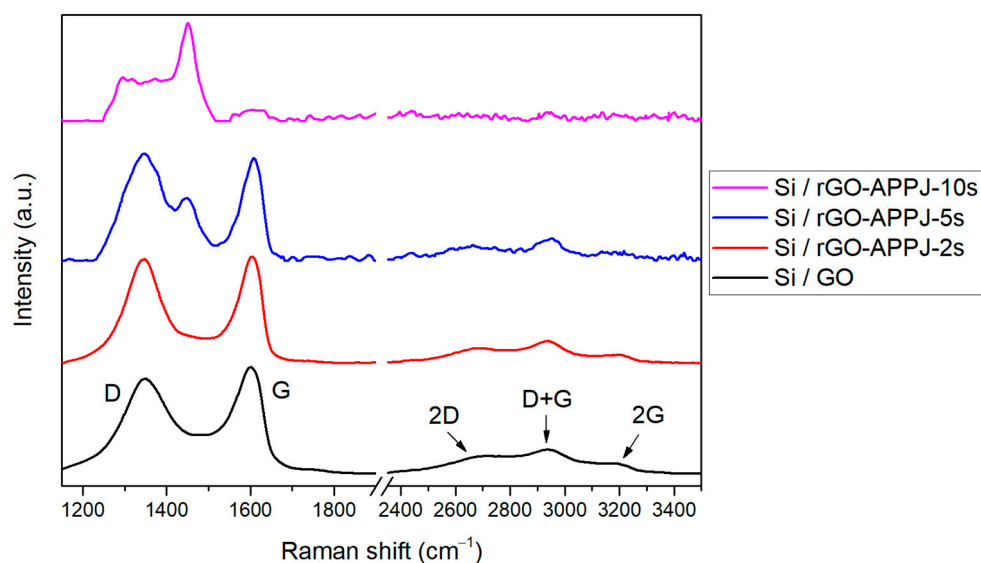

**Figure S3\*.** Raman spectra for the GO and rGO reduced with the APPJ on Si substrates.

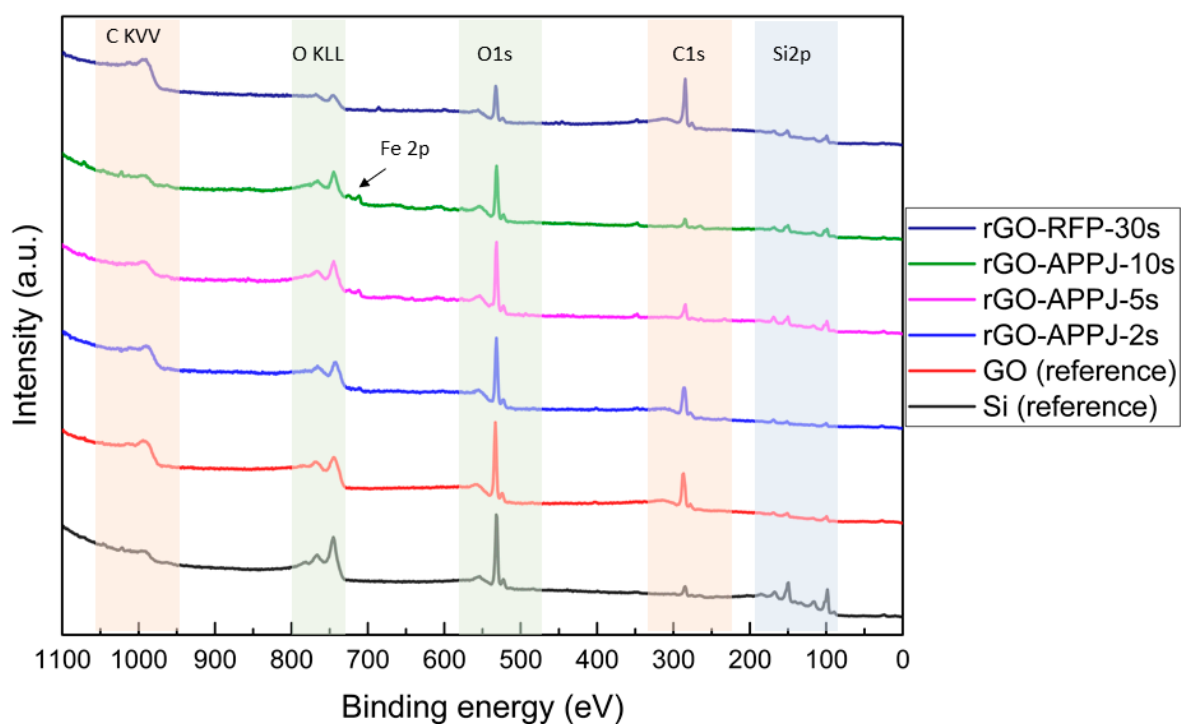

**Figure S4\*.** XPS survey spectra for Si substrate, GO reference and various rGO.

**Table S2\*.** Parameters extracted from the fitted Raman spectra for carbon deposited on ZnO\Ag substrates. Samples were measured with a 633 nm laser excitation.

| Sample     | Parameter                    | D-band | G-band | G <sup>+</sup> -band | D2-band | D3-band | D4-band | D''-band |
|------------|------------------------------|--------|--------|----------------------|---------|---------|---------|----------|
| Ag-C-D3-1S | position (cm <sup>-1</sup> ) | 1325   | 1544   | 1560                 | 1605    | 1487    | 1173    | –        |
|            | FWHM (cm <sup>-1</sup> )     | 174    | 56     | 41                   | 39      | 205     | 290     | –        |
|            | intensity                    | 0.37   | 0.07   | 0.20                 | 0.17    | 0.14    | 0.09    | –        |
| Ag-C-D3-2S | position (cm <sup>-1</sup> ) | 1321   | 1574   | 1595                 | 1611    | 1502    | 1176    | 1076     |
|            | FWHM (cm <sup>-1</sup> )     | 124    | 65     | 35                   | 24      | 151     | 48      | 90       |
|            | intensity                    | 0.99   | 0.21   | 0.55                 | 0.32    | 0.16    | 0.10    | 0.03     |
| Ag-C-D6-1S | position (cm <sup>-1</sup> ) | 1326   | 1561   | 1589                 | 1609    | 1493    | 1180    | 1095     |
|            | FWHM (cm <sup>-1</sup> )     | 159    | 86     | 48                   | 37      | 89      | 108     | 59       |
|            | intensity                    | 0.96   | 0.23   | 0.39                 | 0.35    | 0.25    | 0.11    | 0.04     |
| Ag-C-D6-2S | position (cm <sup>-1</sup> ) | 1323   | 1571   | 1595                 | 1615    | 1492    | 1197    | –        |
|            | FWHM (cm <sup>-1</sup> )     | 111    | 69     | 38                   | 25      | 154     | 79      | –        |
|            | intensity                    | 0.98   | 0.18   | 0.52                 | 0.29    | 0.14    | 0.07    | –        |

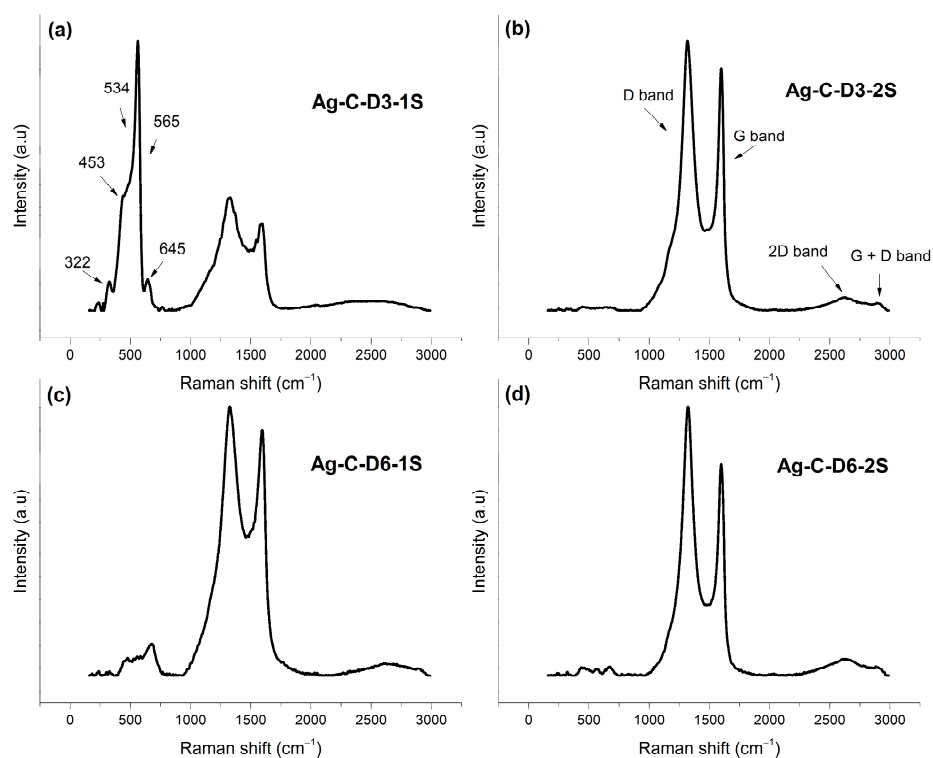

**Figure S5\*.** Raman spectra of the carbon deposited on ZnO/Ag substrates for various time and various nozzle distance: (a) at 3 mm for 1 s, (b) at 3 mm for 2 s, (c) at 6 mm for 1 s, and (d) at 6 mm for 2 s.

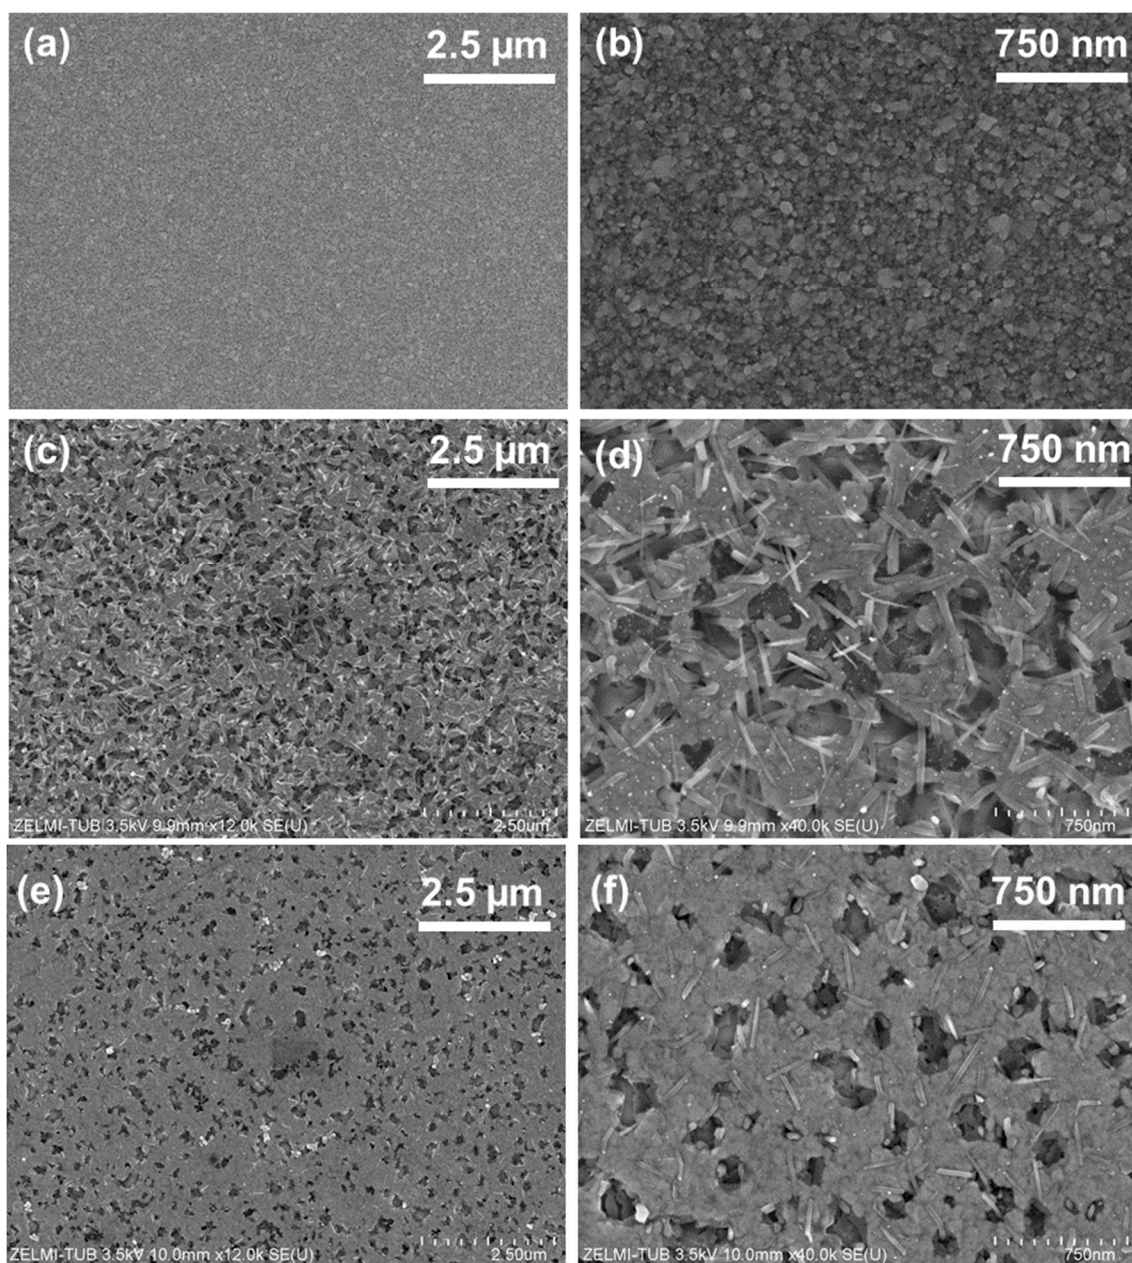

**Figure S6\*.** SEM images of the ZnO/Ag substrate (a-b), Ag-C-D3-1s (c-d), Ag-C-D3-2s (e-f).



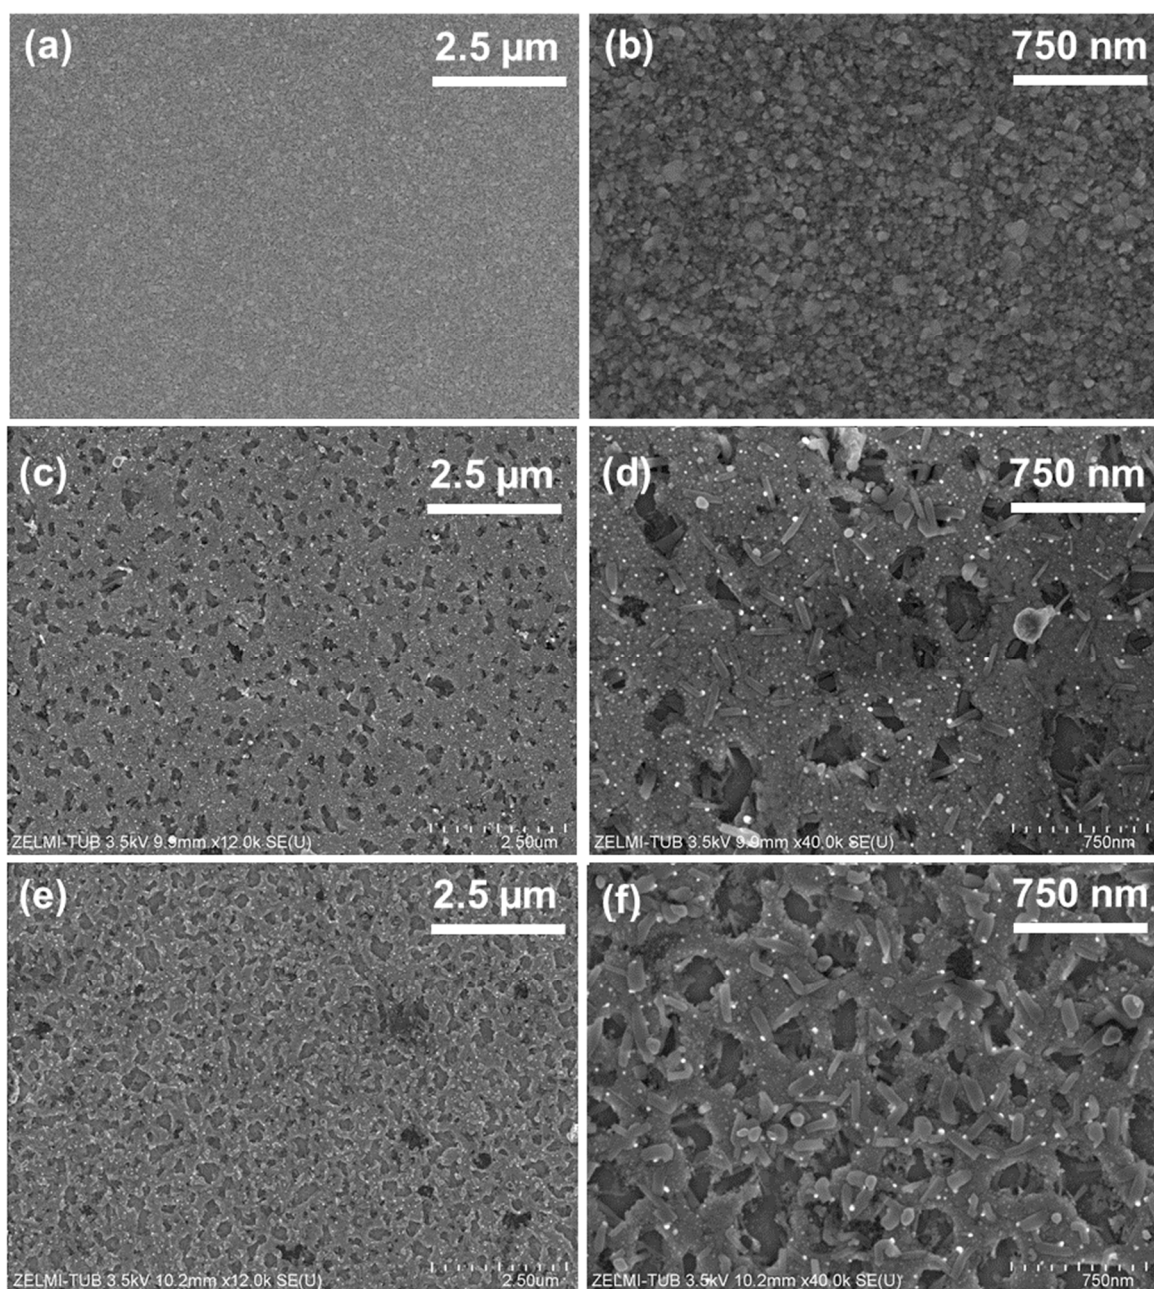

**Figure S7\*.** SEM images of the ZnO / Ag substrate (a-b), Ag-C-D6-1s (c-d), and Ag-C-D6-2s (e-f).

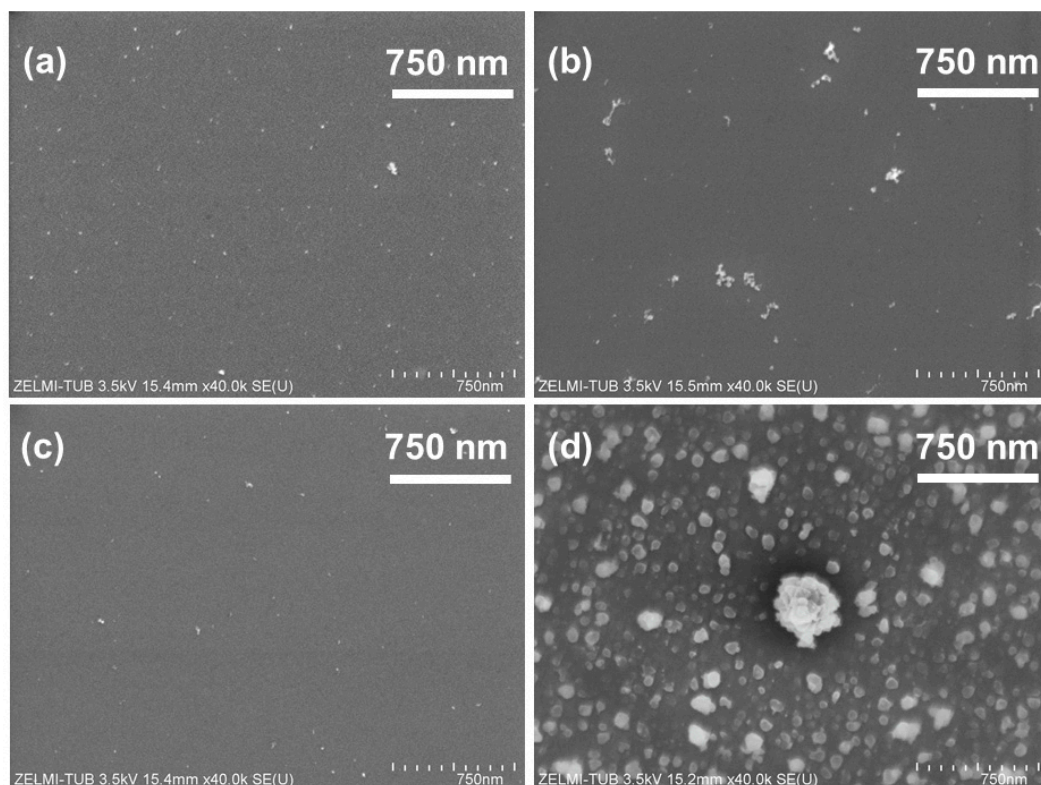

**Figure S8\*.** SEM images of carbon deposited on Si substrates for various time: 5 s (a), 10 s (b), 20 s (c), and 30 s (d).
